# Supplementary material for: A water-soluble fluorescent pH probe and its application for monitoring lysosomal pH changes in living cells
Source: Royal Society of Chemistry journal article supplement (doi:10.1039/d3ay00343d), 2023-01-01
Supplement: d3ay00343d1.pdf [file d3ay00343d1.pdf]

## Electronic Supporting Information

### A water-soluble fluorescent pH probe and its application for monitoring lysosomal pH changes in living cells

Lei Zhang,<sup>a</sup> Jun Guo,<sup>b</sup> Qihua You,<sup>\*,c</sup> and Yuqin Xu<sup>\*,d</sup>

<sup>a</sup> Department of Biology, Xinzhou Teachers University, Xinzhou, Shanxi Province 034000, P. R. of China

<sup>b</sup> ShanXi Weipu Testing Technology Co. LTD, Taiyuan, Shanxi Province 030012, P. R. of China.

<sup>c</sup> College of Environment and Public Health, Xiamen Huaxia University, Xiamen, Fujian Province 361024, P. R. of China

<sup>d</sup> School of Physics and Optoelectronics Engineering, Ludong University, Yantai Shandong Province 264025, P. R. of China.

E-mail address: youqihua@hotmail.com

### Table of contents

|                  |                                                                                                                                                                                                                                               | Page |
|------------------|-----------------------------------------------------------------------------------------------------------------------------------------------------------------------------------------------------------------------------------------------|------|
| <b>Figure S1</b> | <sup>1</sup> H NMR spectrum of probe <b>DCM-MP</b> .                                                                                                                                                                                          | 3    |
| <b>Figure S2</b> | <sup>13</sup> C NMR spectrum of probe <b>DCM-MP</b> .                                                                                                                                                                                         | 3    |
| <b>Figure S3</b> | HRMS spectrum of probe <b>DCM-MP</b> .                                                                                                                                                                                                        | 4    |
| <b>Figure S4</b> | (a) Absorption spectra of <b>DCM-MP</b> in Britton-Robinson buffer (40 mM, pH = 4.0) at various concentration. (b) Plot of absorbance of <b>DCM-MP</b> in Britton-Robinson buffer (40 mM, pH = 4.0) at 440 nm as a function of concentration. | 4    |
| <b>Figure S5</b> | (a) Absorption spectra of <b>DCM-MP</b> in Britton-Robinson buffer                                                                                                                                                                            | 5    |

|                  |                                                                                                                                                                                                                                                                                                                    |   |
|------------------|--------------------------------------------------------------------------------------------------------------------------------------------------------------------------------------------------------------------------------------------------------------------------------------------------------------------|---|
|                  | (40 mM, pH = 8.0) at various concentration. (b) Plot of absorbance of <b>DCM-MP</b> in Britton-Robinson buffer (40 mM, pH = 8.0) at 450 nm as a function of concentration.                                                                                                                                         |   |
| <b>Figure S6</b> | Fluorescence (a) and visual (b) color change of <b>DCM-MP</b> (10 $\mu$ M) in Britton-Robinson buffer (40 mM) at various pH (from left to right: pH = 4.0, 5.0, 6.0, 7.0, 8.0, 9.0 and 10.0, respectively).                                                                                                        | 5 |
| <b>Figure S7</b> | Plot of pH vs $\log[(F_{\max} - F)/(F - F_{\min})]$ using the Henderson-Hasselbach equation: $\log[(F_{\max} - F)/(F - F_{\min})] = \text{pK}_a - \text{pH}$ , where F is the observed fluorescence intensity at 640 nm of <b>DCM-MP</b> . The y-intercept is the pKa value ( $6.70 \pm 0.04$ ) of <b>DCM-MP</b> . | 6 |
| <b>Figure S8</b> | Cell viability of U87 cells treated with various concentrations (0, 5, 10, 20, 50 $\mu$ M) of <b>DCM-MP</b> for 6 h. Cell viability was assessed by using the MTT assay. The results were presented as means $\pm$ SE with replicates $n = 3$ .                                                                    | 6 |
| <b>Figure S9</b> | Plot of relative fluorescence intensity as a function of pH in U87 cells (Data were generated from Figure 7). Relative fluorescence intensity was analyzed by the Image J. The results were presented as means $\pm$ SE with replicates $n = 3$ .                                                                  | 7 |

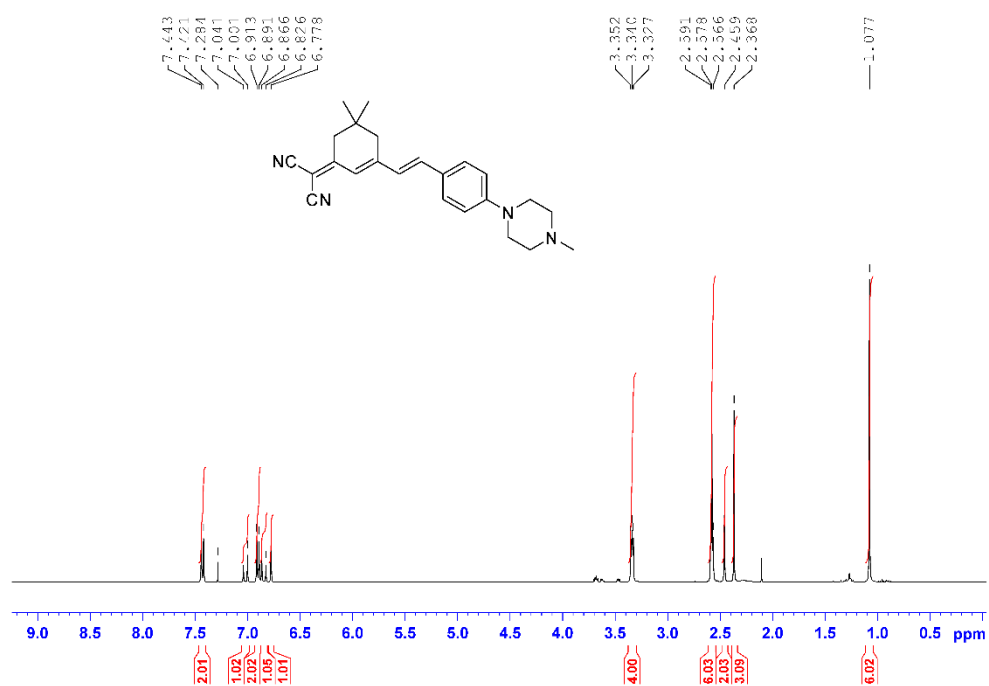

Figure S1. <sup>1</sup>H NMR spectrum of probe DCM-MP.

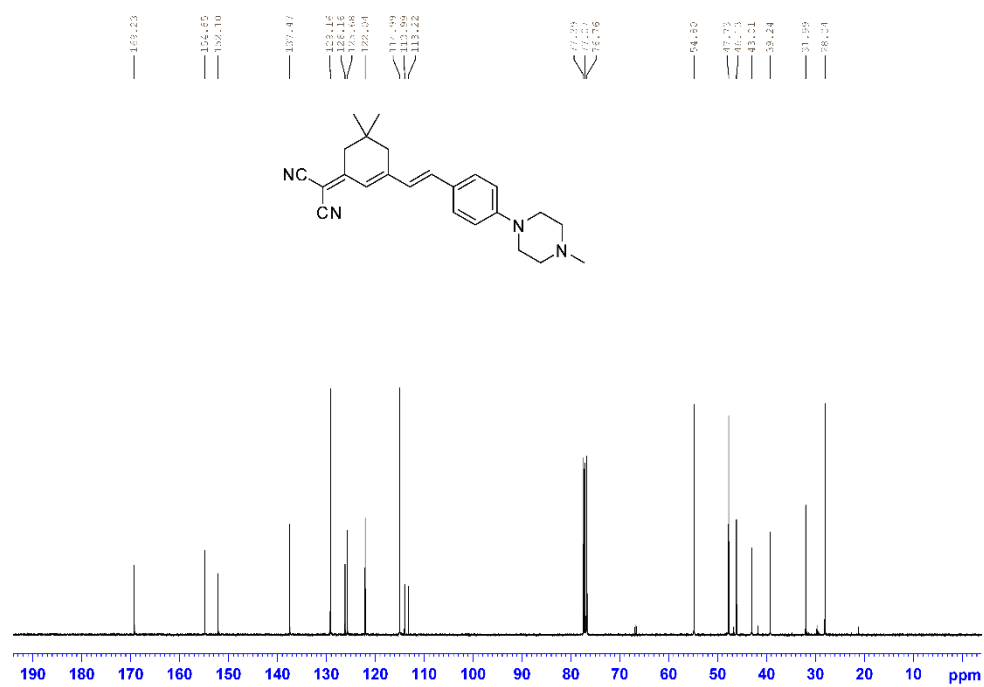

Figure S2. <sup>13</sup>C NMR spectrum of probe DCM-MP.

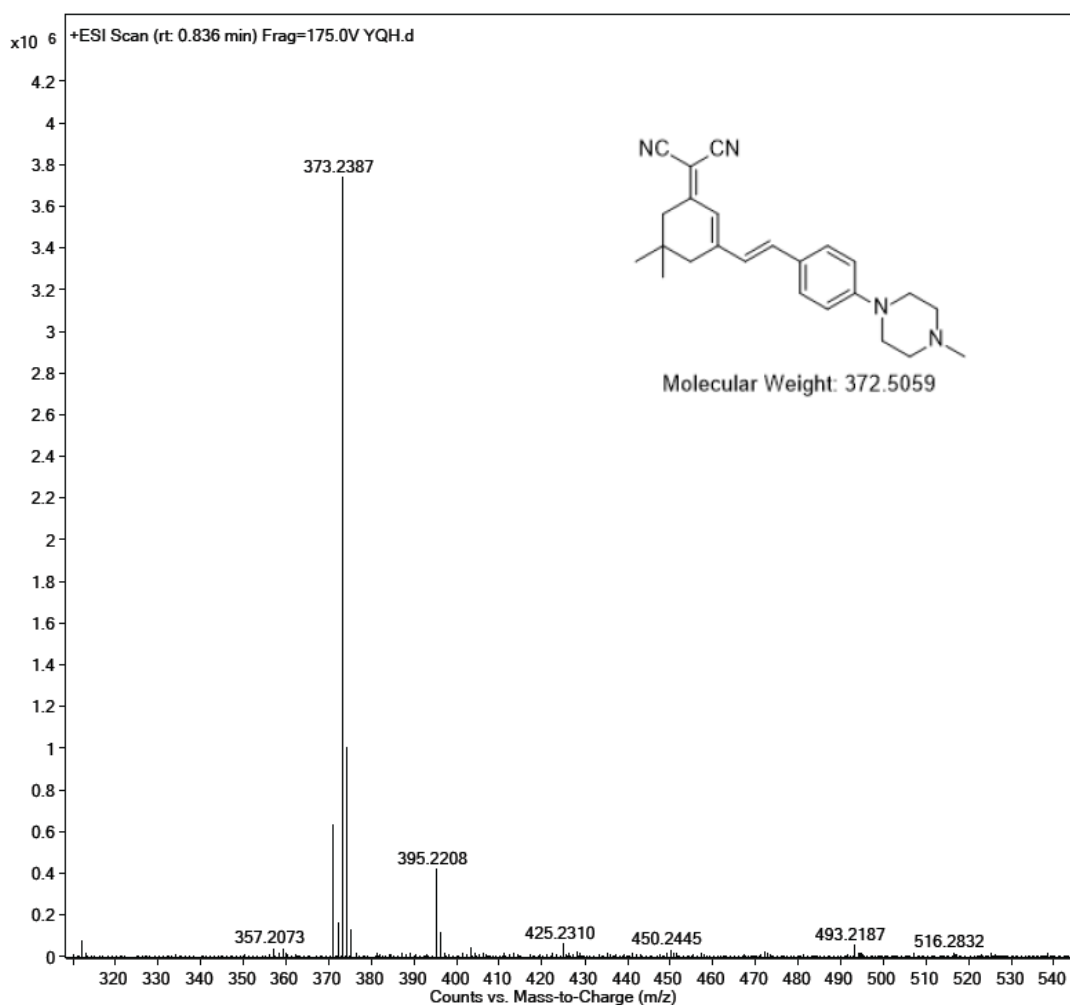

**Figure S3.** HRMS spectrum of probe **DCM-MP**.

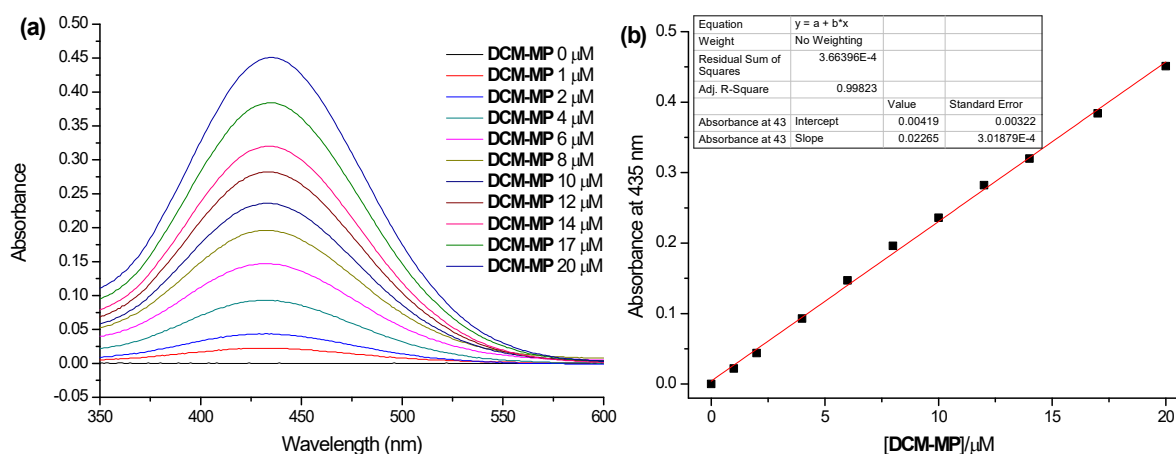

**Figure S4.** (a) Absorption spectra of **DCM-MP** in Britton-Robinson buffer (40 mM, pH = 4.0) at various concentration. (b) Plot of absorbance of **DCM-MP** in Britton-Robinson buffer (40 mM, pH = 4.0) at 440 nm as a function of concentration.

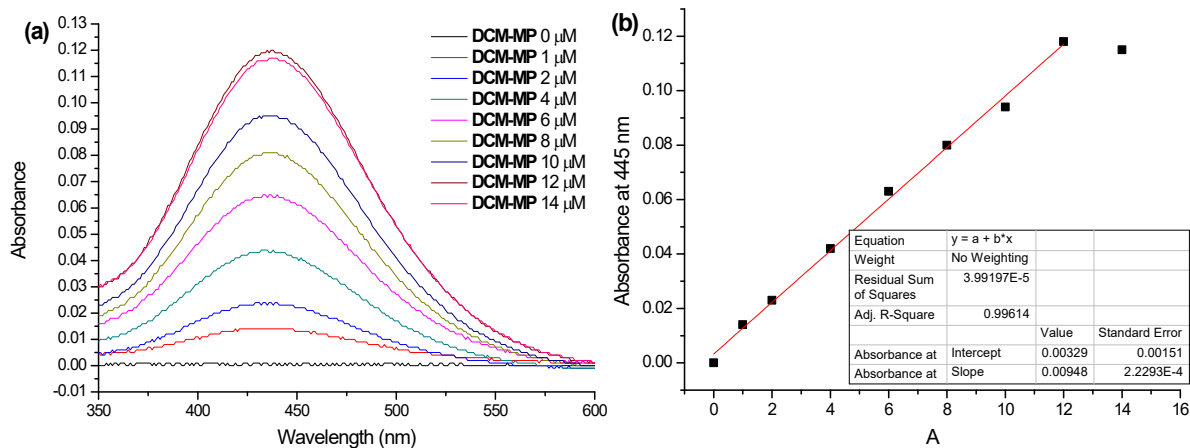

**Figure S5.** (a) Absorption spectra of **DCM-MP** in Britton-Robinson buffer (40 mM, pH = 8.0) at various concentration. (b) Plot of absorbance of **DCM-MP** in Britton-Robinson buffer (40 mM, pH = 8.0) at 445 nm as a function of concentration.

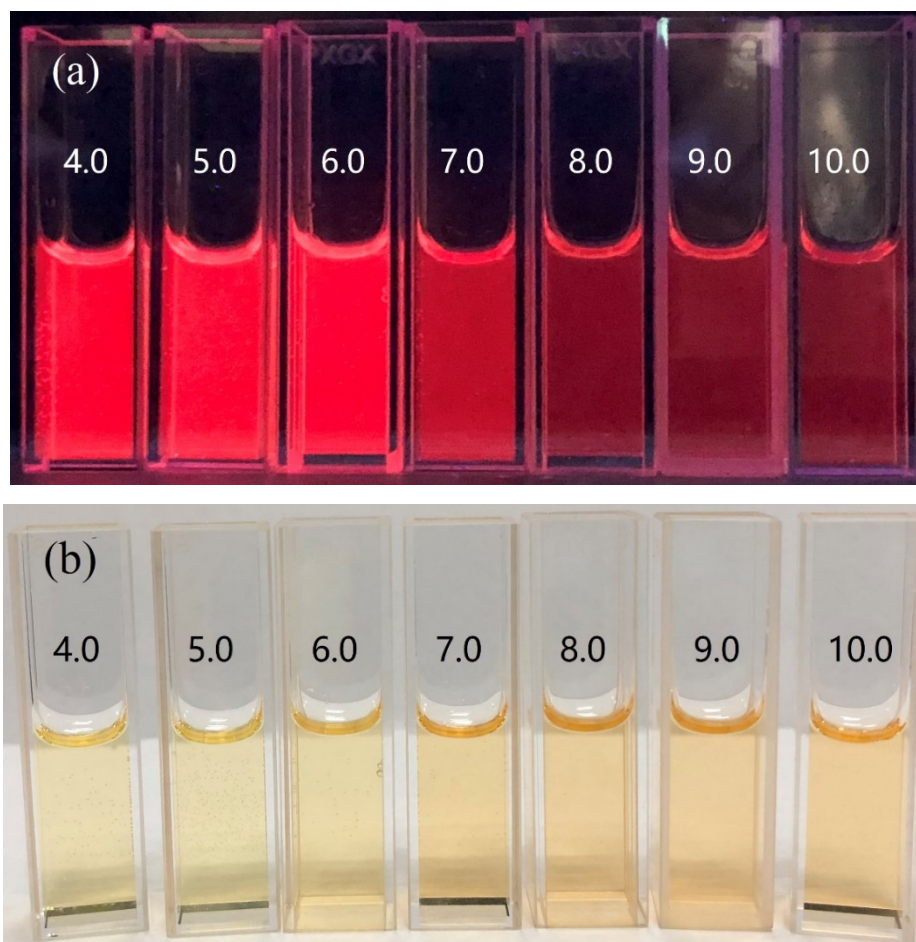

**Figure S6.** Fluorescence (a) and visual (b) color change of **DCM-MP** (10 μM) in Britton-Robinson buffer (40 mM) at various pH (from left to right: pH = 4.0, 5.0, 6.0, 7.0, 8.0, 9.0 and 10.0, respectively).

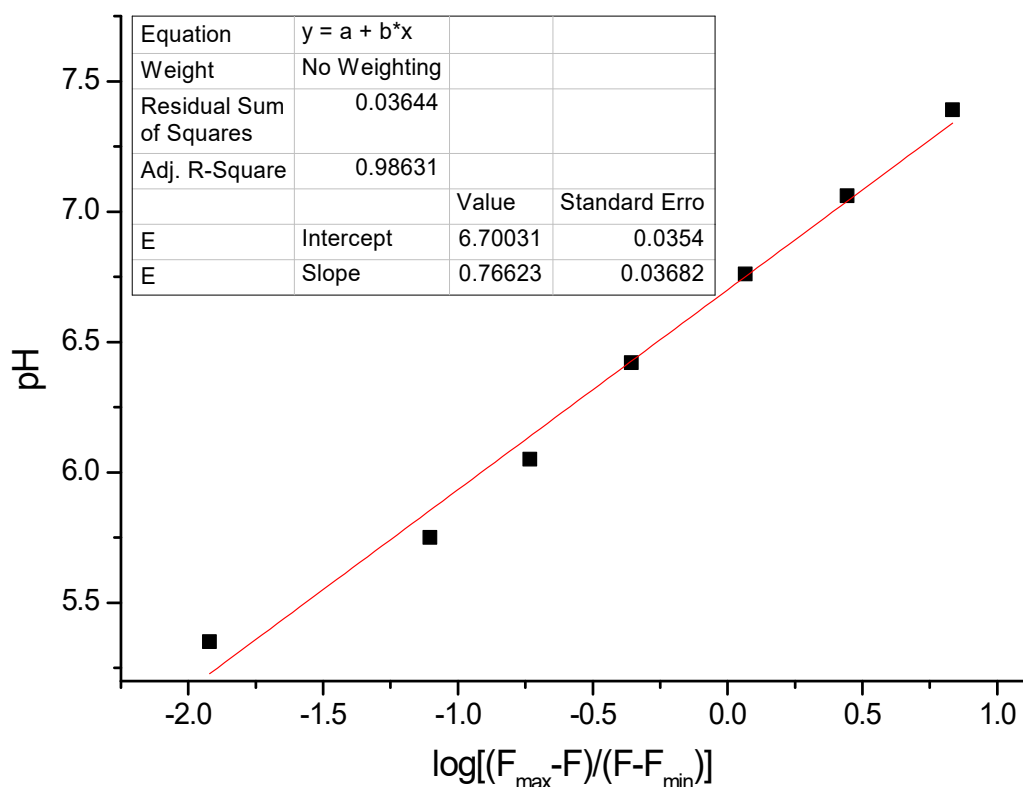

**Figure S7.** Plot of pH vs  $\log[(F_{\max} - F)/(F - F_{\min})]$  using the Henderson-Hasselbach equation:  $\log[(F_{\max} - F)/(F - F_{\min})] = \text{pK}_a - \text{pH}$ , where F is the observed fluorescence intensity at 640 nm of **DCM-MP**. The y-intercept is the  $\text{pK}_a$  value ( $6.70 \pm 0.04$ ) of **DCM-MP**.

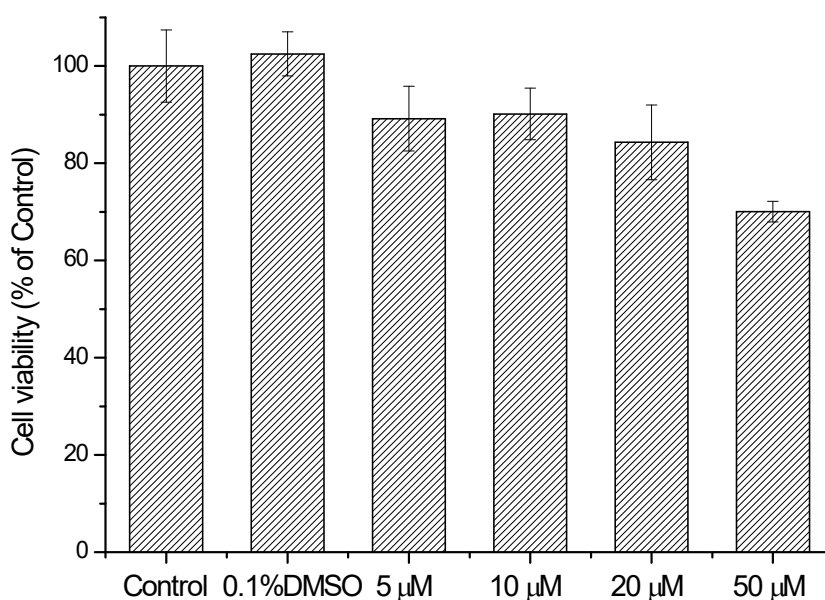

**Figure S8.** Cell viability of U87 cells treated with various concentrations (0, 5, 10, 20, 50  $\mu\text{M}$ ) of **DCM-MP** for 6 h. Cell viability was assessed by using the MTT assay. The results were presented as means  $\pm$  SE with replicates n = 3.

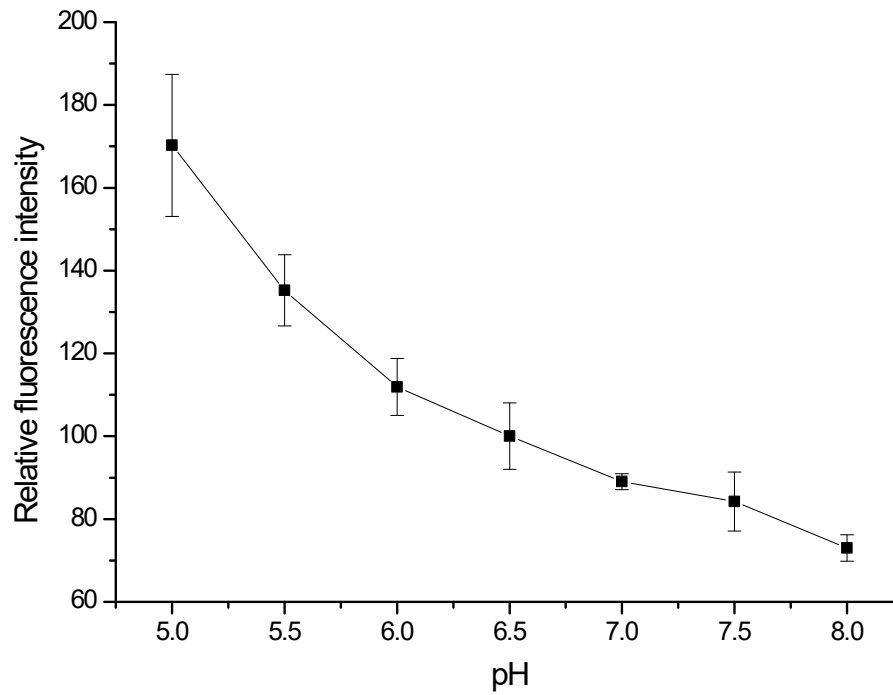

**Figure S9.** Plot of relative fluorescence intensity as a function of pH in U87 cells (Data were generated from Figure 7). Relative fluorescence intensity was analyzed by the Image J. The results were presented as means  $\pm$ SE with replicates  $n = 3$ .
